# Supplementary material for: A Robotic Neck Exoskeleton for Children with Poor Head Control: A Feasibility Study
Source: Research Square preprint supplement (doi:10.21203/rs.3.rs-8177057/v1), 2025-12-01
Supplement: Supplementary file 1 [file bbd594a68d062ed0187a6f9f.xlsx]

## Sheet: Sheet1
Participant ID	Visit number	Condition	Twist Contribution	Mean EMG	Mean EMG/deg	MeanFlexExt_deg	MeanLatBen_deg	MeanTwist_deg
P1	1	no exo		0.0855117
P1	1	zero-torque	0.243853	0.0506309	0.504806	24.9066	6.21662	7.24805
P1	1	low	0.779221	0.117444	4.1517	4.36622	3.64924	8.83697
P1	1	medium	0.772263	0.0762944	4.683	1.35883	1.99845	3.74069
P1	1	high	0.853911	0.130474	11.1463	1.57136	1.68048	4.60279
P1	2	no exo		0.087597
P1	2	zero-torque	0.089943	0.0830164	1.98723	13.2363	2.22762	1.22093
P1	2	low	0.544325	0.087351	2.77674	9.15004	2.36574	6.7944
P1	2	medium	0.729389	0.137473	9.22126	2.31928	2.33931	4.67777
P1	2	high	0.723592	0.0849246	6.83872	1.73056	2.09043	3.66953
P1	3	no exo		0.048202
P1	3	zero-torque	0.297555	0.0395549	1.78103	9.63601	15.7988	6.61653
P1	3	low	0.878759	0.050112	3.33161	1.43424	4.12902	10.3875
P1	3	medium	0.887217	0.0267787	3.18486	1.6834	2.06924	6.60548
P1	3	high	0.937728	0.0339385	8.6792	0.678643	1.42019	4.73071
P2	1	no exo		0.0821405
P2	1	zero-torque	0.345013	0.0550881	7.72342	15.4777	5.90778	6.80787
P2	1	low	0.69382	0.0300313	2.52522	6.16381	4.63541	9.58303
P2	1	medium	0.439527	0.0470459	4.83674	5.4706	1.82819	3.2345
P2	1	high	0.542431	0.0609472	17.0835	1.32084	1.27207	1.58608
P2	2	no exo		0.0383461
P2	2	zero-torque	0.662664	0.0459527	1.6184	6.16718	11.5683	14.3011
P2	2	low	0.799315	0.0304663	3.56363	2.15567	2.60654	6.44679
P2	2	medium	0.732607	0.0207658	2.66385	2.52088	0.797946	3.3033
P2	2	high	0.576005	0.0196079	5.80603	0.800788	1.48176	1.27945
P2	3	no exo		0.0445853
P2	3	zero-torque	0.355679	0.0375794	1.76707	11.2654	9.03231	6.34381
P2	3	low	0.844463	0.0341715	3.76584	3.3299	3.70383	10.0396
P2	3	medium	0.685418	0.0374304	5.54948	3.50698	1.69197	4.65948
P2	3	high	0.763754	0.0399724	9.52368	1.67088	1.58534	3.66315
P3	1	no exo		0.0703612
P3	1	zero-torque	0.439694	0.0543656	1.36474	18.3412	12.9345	12.2838
P3	1	low	0.390719	0.0536881	1.351	14.7327	4.08602	6.76993
P3	1	medium	0.74869	0.0588367	4.76463	2.98369	2.75844	5.46886
P3	1	high	0.758037	0.0813475	7.46553	2.63518	1.26664	4.00854
P3	2	no exo		0.0736626
P3	2	zero-torque	0.713267	0.0413934	1.86818	4.35081	4.91137	7.74534
P3	2	low	0.612916	0.0538688	5.24271	2.08752	2.60252	3.61925
P3	2	medium	0.478752	0.037183	1.82428	3.94117	1.38151	2.73401
P3	2	high	0.678246	0.0245589	5.45366	0.93267	1.43281	1.96943
P3	3	no exo		0.0555043
P3	3	zero-torque	0.256747	0.0713279	1.7521	22.0312	12.6788	7.0552
P3	3	low	0.812868	0.0348521	2.89288	1.63504	4.1329	6.53194
P3	3	medium	0.804545	0.27855	16.1303	2.22954	2.73604	5.45768
P3	3	high	0.427532	0.198796	70.2349	1.89591	0.767376	1.19018
P4	1	no exo		0.0265087
P4	1	zero-torque	0.338921	0.0179724	0.292447	7.76563	23.7	9.26422
P4	1	low	0.433101	0.0206711	0.859202	1.24616	8.51133	4.43326
P4	1	medium	0.542277	0.0187624	0.875285	0.916778	5.80101	4.09143
P4	1	high	0.337105	0.0122221	1.37936	0.593801	3.72486	1.41222
P4	2	no exo		0.0946896
P4	2	zero-torque	0.417954	0.0731468	0.942496	6.30871	14.8637	8.06151
P4	2	low	0.711259	0.0535554	1.04983	2.29368	9.26512	10.1726
P4	2	medium	0.725882	0.0447776	1.17551	2.95033	4.99456	7.05325
P4	2	high	0.739825	0.0498892	1.9856	1.32061	3.47852	4.56079
P4	3	no exo		0.050727
P4	3	zero-torque	0.363416	0.0329158	0.795983	8.95463	11.8572	6.46492
P4	3	low	0.460046	0.0274194	1.22748	6.8391	3.5978	4.59816
P4	3	medium	0.372428	0.0263258	2.22723	3.94664	2.92025	2.20644
P4	3	high	0.517558	0.0286448	3.89242	1.41353	2.51943	2.06774
P5	1	no exo		0.076499
P5	1	zero-torque	0.583481	0.071517	2.0653	7.59618	8.46808	9.89567
P5	1	low	0.682899	0.091921	6.66819	3.58356	4.20968	6.2542
P5	1	medium	0.665078	0.0679739	11.7407	2.47664	2.02028	3.67037
P5	1	high	0.76016	0.129102	20.7556	1.5417	2.04929	3.88504
P5	2	no exo		0.0928473
P5	2	zero-torque	0.22413	0.0864274	2.56076	8.72874	8.78801	3.16424
P5	2	low	0.518021	0.0611687	3.74616	5.07957	3.25397	4.44284
P5	2	medium	0.711751	0.0926167	5.2296	2.61101	3.12537	5.33712
P5	2	high	0.582685	0.0733442	7.86488	2.40797	3.14357	3.25751
P5	3	no exo		0.0478688
P5	3	zero-torque	0.722498	0.156062	15.3197	5.95704	5.81827	11.354
P5	3	low	0.633935	0.217908	35.314	3.09121	3.79542	5.2969
P5	3	medium	0.711553	0.0785786	30.6611	1.66749	2.11819	3.30579
P5	3	high	0.778235	0.0351132	13.9314	0.732446	1.47798	2.52689
